# Supplementary material for: Alisol A 24-acetate stimulates lipolysis in 3 T3-L1 adipocytes
Source: PubMed Central journal article supplement (PMC8063434; doi:10.1186/s12906-021-03296-0), 2021-04-22

### Full blots of proteins

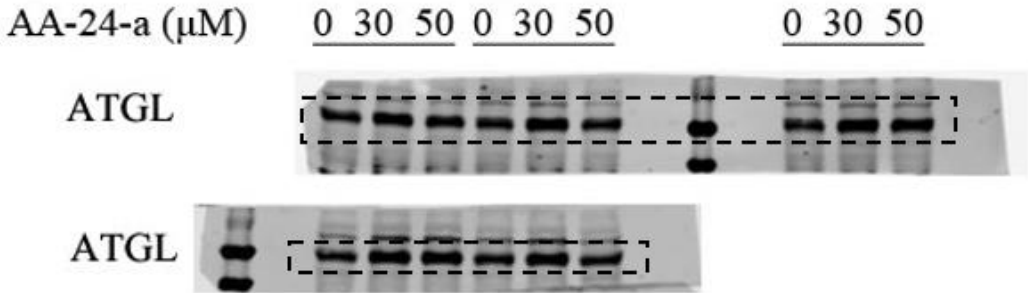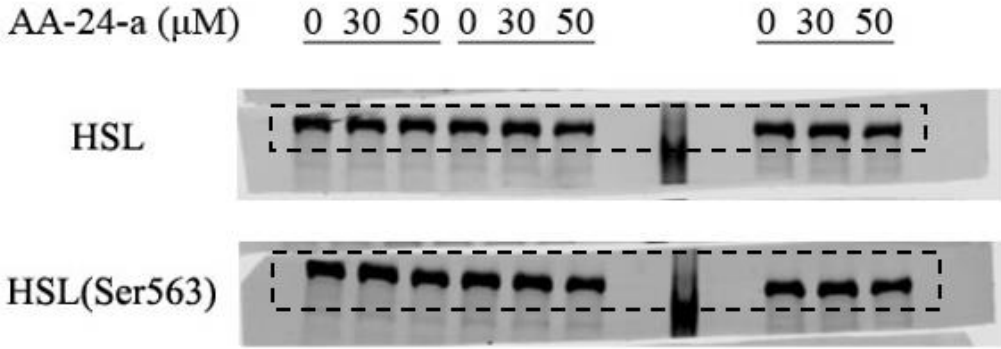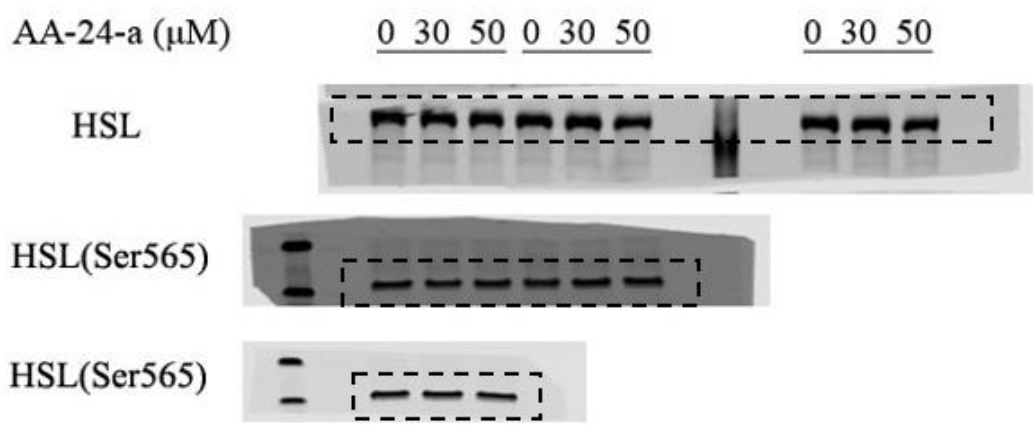

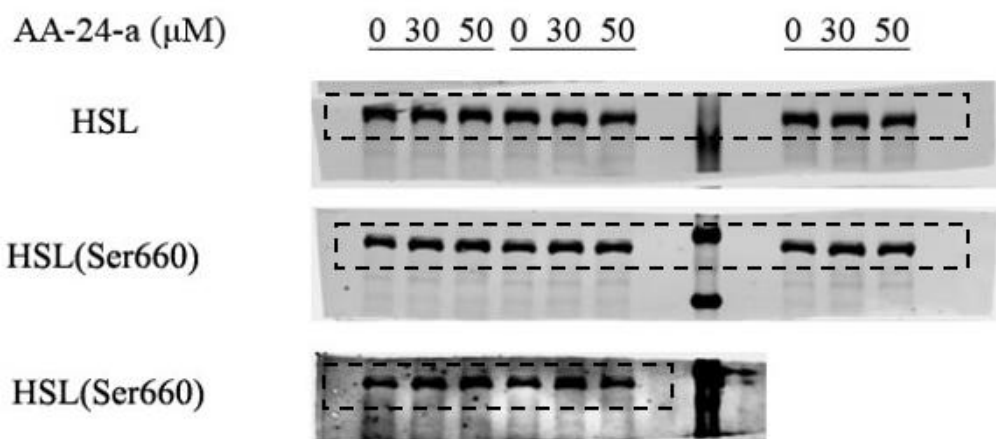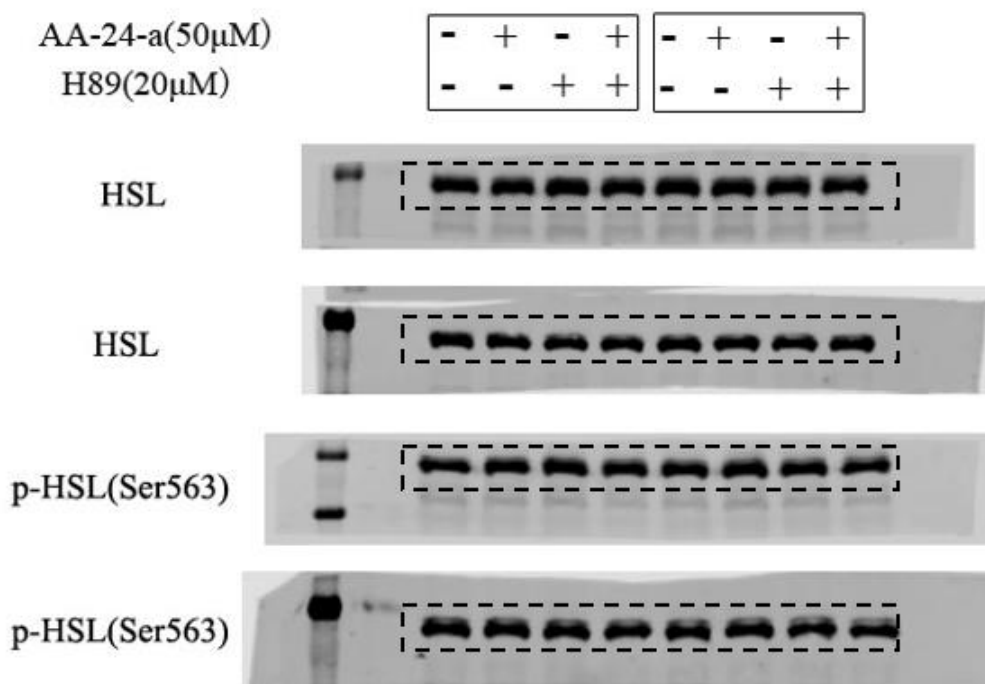

AA-24-a(50 $\mu$ M)  
H89(20 $\mu$ M)

|   |   |   |   |   |   |   |   |
|---|---|---|---|---|---|---|---|
| - | + | - | + | - | + | - | + |
| - | - | + | + | - | - | + | + |

HSL

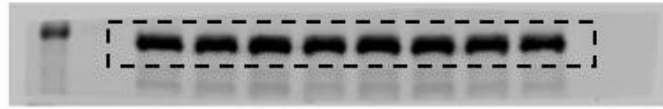

HSL

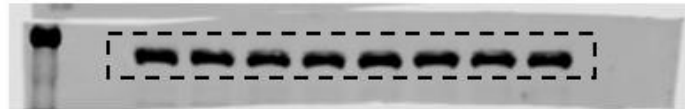

p-HSL(Ser565)

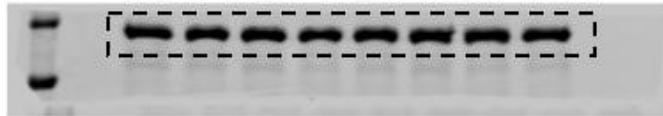

p-HSL(Ser565)

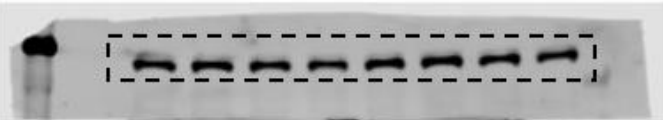

AA-24-a(5 $\mu$ M)  
H89(20 $\mu$ M)

|   |   |   |   |   |   |   |   |
|---|---|---|---|---|---|---|---|
| - | + | - | + | - | + | - | + |
| - | - | + | + | - | - | + | + |

HSL

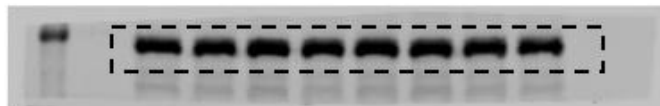

HSL

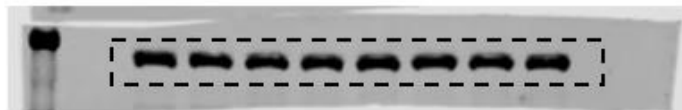

p-HSL(Ser660)

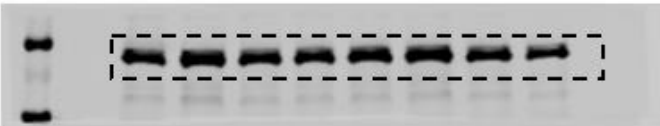

p-HSL(Ser660)

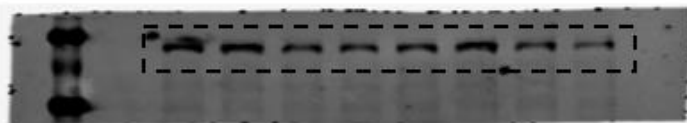

AA-24-a(50μM)  
PD98059(50μM)

|   |   |   |   |   |   |   |   |
|---|---|---|---|---|---|---|---|
| - | + | - | + | - | + | - | + |
| - | - | + | + | - | - | + | + |

p-ERK

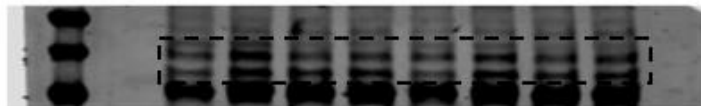

p-ERK

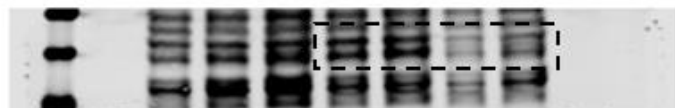

AA-24-a(50μM)  
PD98059(50μM)

|   |   |   |   |   |   |   |   |
|---|---|---|---|---|---|---|---|
| - | + | - | + | - | + | - | + |
| - | - | + | + | - | - | + | + |

PPARγ

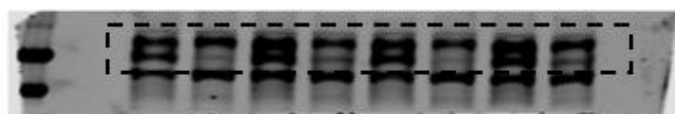

PPARγ

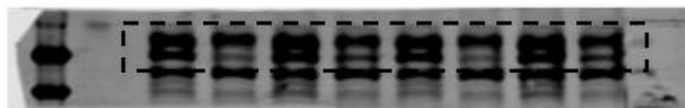

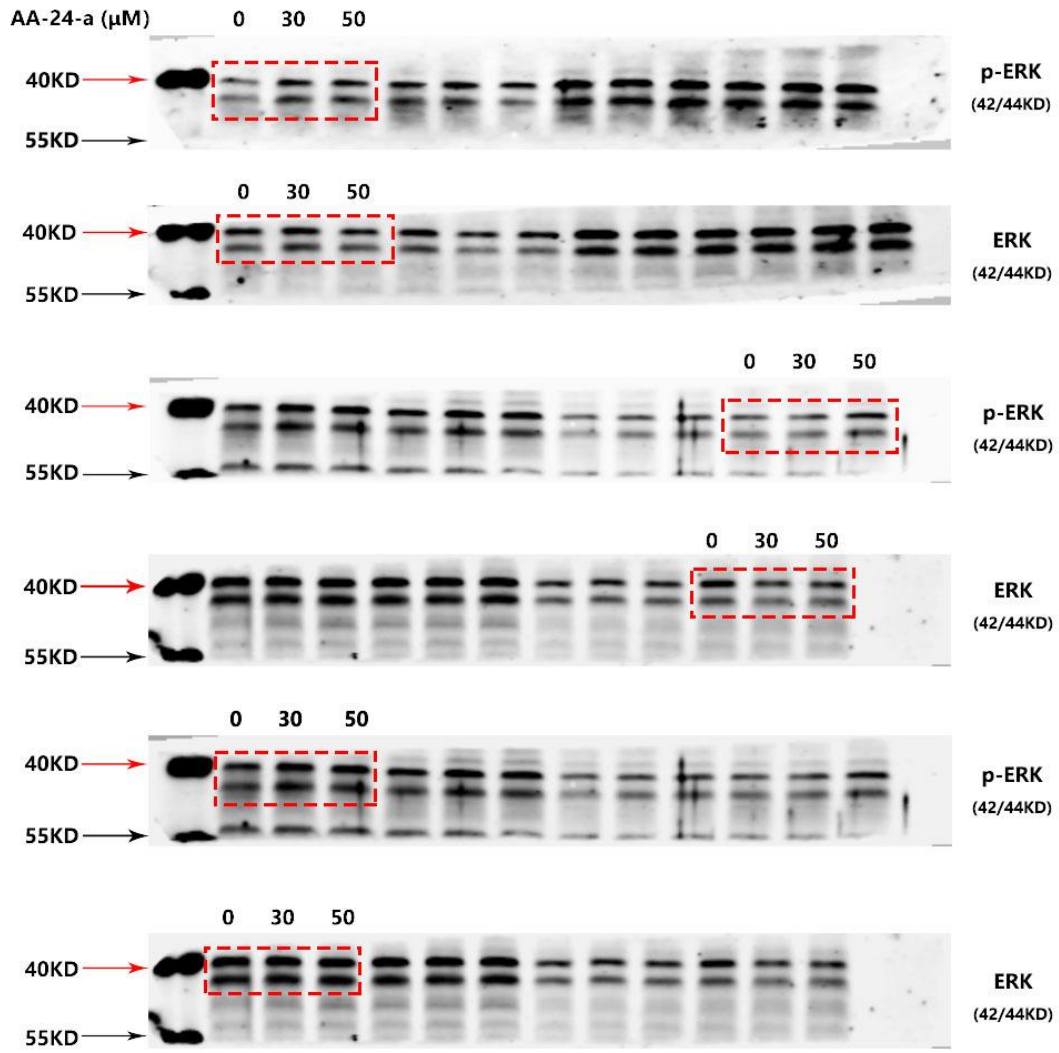

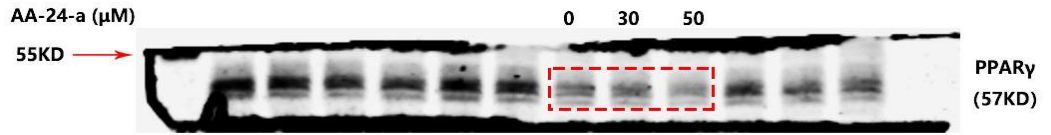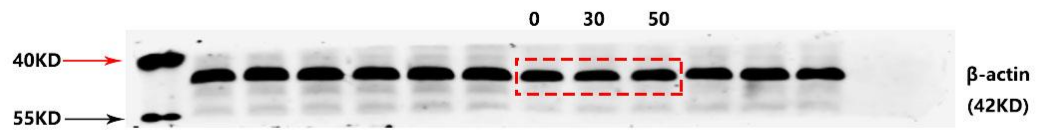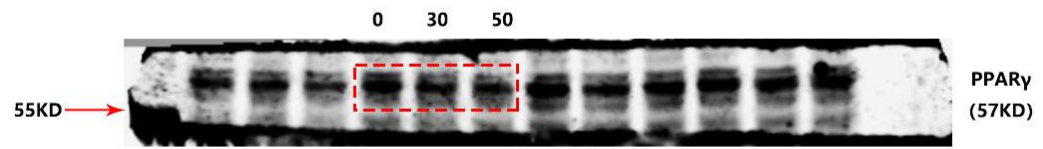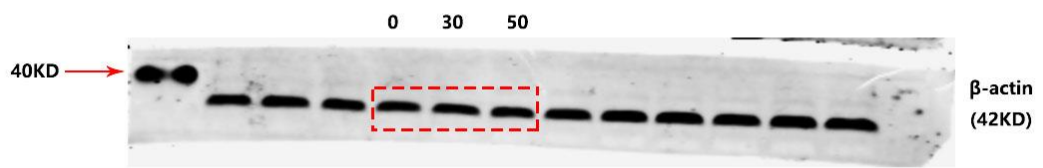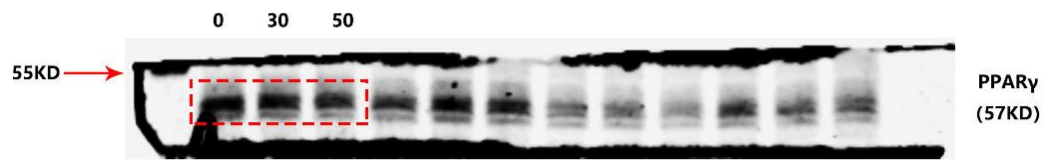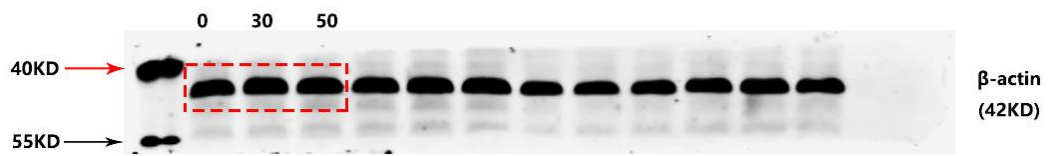

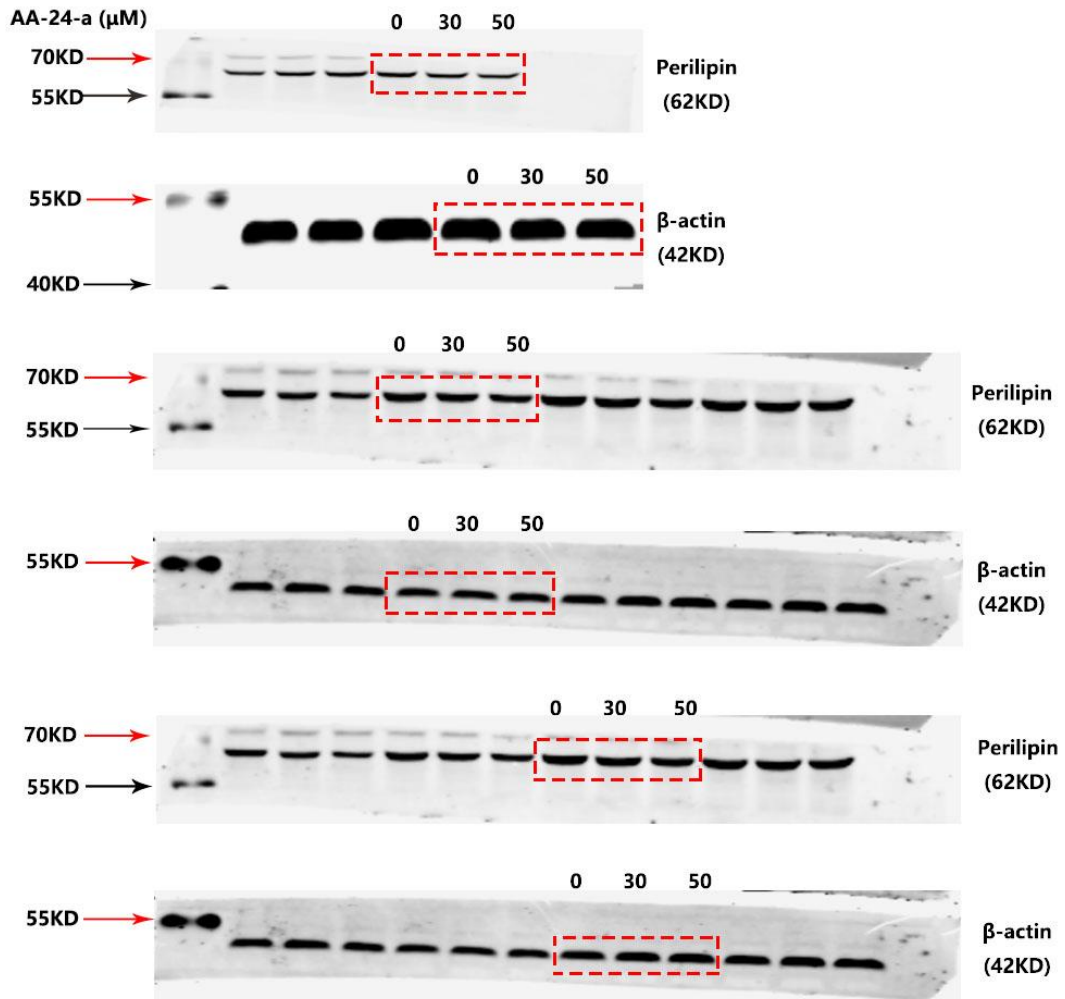

Supplement: 12906_2021_3296_MOESM3_ESM.pdf [file 12906_2021_3296_MOESM3_ESM.pdf]
